# Supplementary material
Source: PubMed Central journal article supplement (PMC2802684)

## **Supplementary Data**

### **Activation of PPAR $\gamma$ Induces Profound Multilocularization and Remodeling of Adipocytes in Adult Mouse White Adipose Tissues**

**(PPAR $\gamma$  Induces Multilocularization in Adipocytes)**

**Young Jun Koh<sup>1</sup>, Byung-Hyun Park<sup>2</sup>, Ji-Hyun Park<sup>2</sup>, Jinah Han<sup>1</sup>, In-Kyu Lee<sup>3</sup>,  
Jin Woo Park<sup>2</sup>, Gou Young Koh<sup>1</sup>**

<sup>1</sup>National Research Laboratory of Vascular Biology and Department of Biological Sciences, Korea Advanced Institute of Science and Technology.

Daejeon, 305-701, Korea

<sup>2</sup>Department of Biochemistry and Internal Medicine, College of Medicine, Chonbuk National University, Jeonju, 560-180, Korea

<sup>3</sup>Department of Internal Medicine, Endocrinology Section, Kyung-Book National University, Daegu, 540-749, Korea

Correspondence author:

Gou Young Koh

Department of Biological Sciences, KAIST

373-1, Guseong-dong, Daejeon, 305-701, Republic of Korea

Phone: 82-42-869-2638

Fax: 82-42-869-2610

E-mail: [gykoh@kaist.ac.kr](mailto:gykoh@kaist.ac.kr)

**Supplementary Table 1: Primers for sqRT-PCR and qrRT-PCR**

|                                 |         |                                |
|---------------------------------|---------|--------------------------------|
| <i>ucp-1</i>                    | Forward | 5'-GTGAAGGTCAGAATGCAAGC-3'     |
|                                 | Reverse | 5'-AGGGCCCCCTTCATGAGGTC-3'     |
| <i>pgc-1<math>\alpha</math></i> | Forward | 5'-CTCTCTGGAACTGCAGGCCT-3'     |
|                                 | Reverse | 5'-ATCCATGGCTAGTCCTGAAT-3'     |
| <i>gapdh</i>                    | Forward | 5'-TTCCTACCCCAATGTGTCCGTC-3'   |
|                                 | Reverse | 5'-ACCCTGTTGCTGTAGCCGTATTCA-3' |

## Supplementary Figure Legends

**Supplementary Figure 1. ROSI induce profound multilocularization in the adipocytes of adult WAT of mice regardless of sex.** The indicated adipose tissues were harvested from C57BL/6J male (M) and female (F) adult mice that had treated with nothing (Control) or ROSI (~15 mg/kg/day) for 3 weeks. **(A)** Tissues were whole-mounted, co-immunostained for perilipin (for lipid droplets) and collagen IV (the basement membrane that surrounds each adipocyte), and merged. Note that adipocytes with variable and smaller-sized perilipin<sup>+</sup> lipid droplets are abundantly detected in ROSI-treated adipose tissues. Scale bars, 20  $\mu$ m. **(B)** Multilocular adipocytes were counted in 10 regions (~100 adipocytes/region) per indicated adipose tissue in each male and female mouse of Control (n=3) or ROSI (n=4), and presented as a percentage of the total adipocytes counted. Bars represent the mean  $\pm$  SD. \*,  $P < 0.01$  versus control.

**Supplementary Figure 2. FENO does not induce multilocularization in the adipocytes of adult adipose tissues of mice.** The indicated adipose tissues were harvested from C57BL/6J mice that had treated nothing (Control) or FENO (~150 mg/kg/day) for 3 weeks. **(A)** Tissues were whole-mounted, co-immunostained for perilipin and collagen IV, and merged. Note that few multilocular adipocytes are detected in FENO-treated adipose tissues. Scale bars, 20  $\mu$ m. **(B)** Multilocular adipocytes were counted in 10 regions (~100 adipocytes/region) per adipose tissue treated with nothing (n=3) or FENO (n=4), and presented as a percentage of the total counted adipocytes. Bars represent the mean  $\pm$  SD.

**Supplementary Figure 3. ROSI induces remodeling in the form of reduced size of adipocytes in adult adipose tissues of mice.** The indicated adipose tissues were harvested from C57BL/6J mice that had been treated with nothing (Control) or ROSI (~15 mg/kg/day) for 3 weeks. **(A)** Tissues were paraffin-embedded, sectioned, and HE stained. Note that smaller and more variably-sized adipocytes are detected in ROSI-treated adipose tissues. Scale bars, 20  $\mu$ m.

**Supplementary Figure 4.  $\beta_3$ -adrenoceptor CL316,243 increases mitochondrial content in multilocular adipocytes of adult adipose tissues.** The indicated adipose tissues were harvested from C57BL/6J mice that had been treated with control buffer (Control) or CL316,243 (~0.1 mg/kg/day) for 3 weeks. Tissues were whole-mounted, co-immunostained for collagen IV and Mitotracker, and stained with BODIPY 493/503

(BD, for lipid droplet). Note that CL316,243-induced multilocular adipocytes contain substantially increased mitochondrial content. Scale bars, 20  $\mu\text{m}$ .

**Supplementary Figure 5. ROSI increases mitochondrial content in the multilocular adipocytes of the adult adipose tissues.** The indicated adipose tissues were harvested from C57BL/6J mice that had treated with nothing (Control) or ROSI (~15 mg/kg/day) for 3 weeks. Tissues were whole-mounted, co-immunostained for collagen IV and Mitotracker, and stained with BODIPY 493/503 (BD, for lipid droplet). Note that ROSI-induced multilocular adipocytes contain substantially increased mitochondrial content. Scale bars, 20  $\mu\text{m}$ .

**Supplementary Figure 6. ROSI increases mRNA of *ucp-1* and *pgc-1 $\alpha$*  in the subcutaneous adipose tissues of mice.** Subcutaneous adipose tissues were harvested from C57BL/6J mice that had treated with nothing (Con) or ROSI (~15 mg/kg/day) for 3 weeks. Total RNA were extracted from the isolated adipocytes and semi-quantitative RT-PCR performed with the appropriate primers. Each mRNA levels were normalized by *gapdh* and presented as relative density. The relative density measured for each control is arbitrarily presented as 1. Bars represent mean  $\pm$  SD (n=4). \*,  $P < 0.05$  versus Cont.

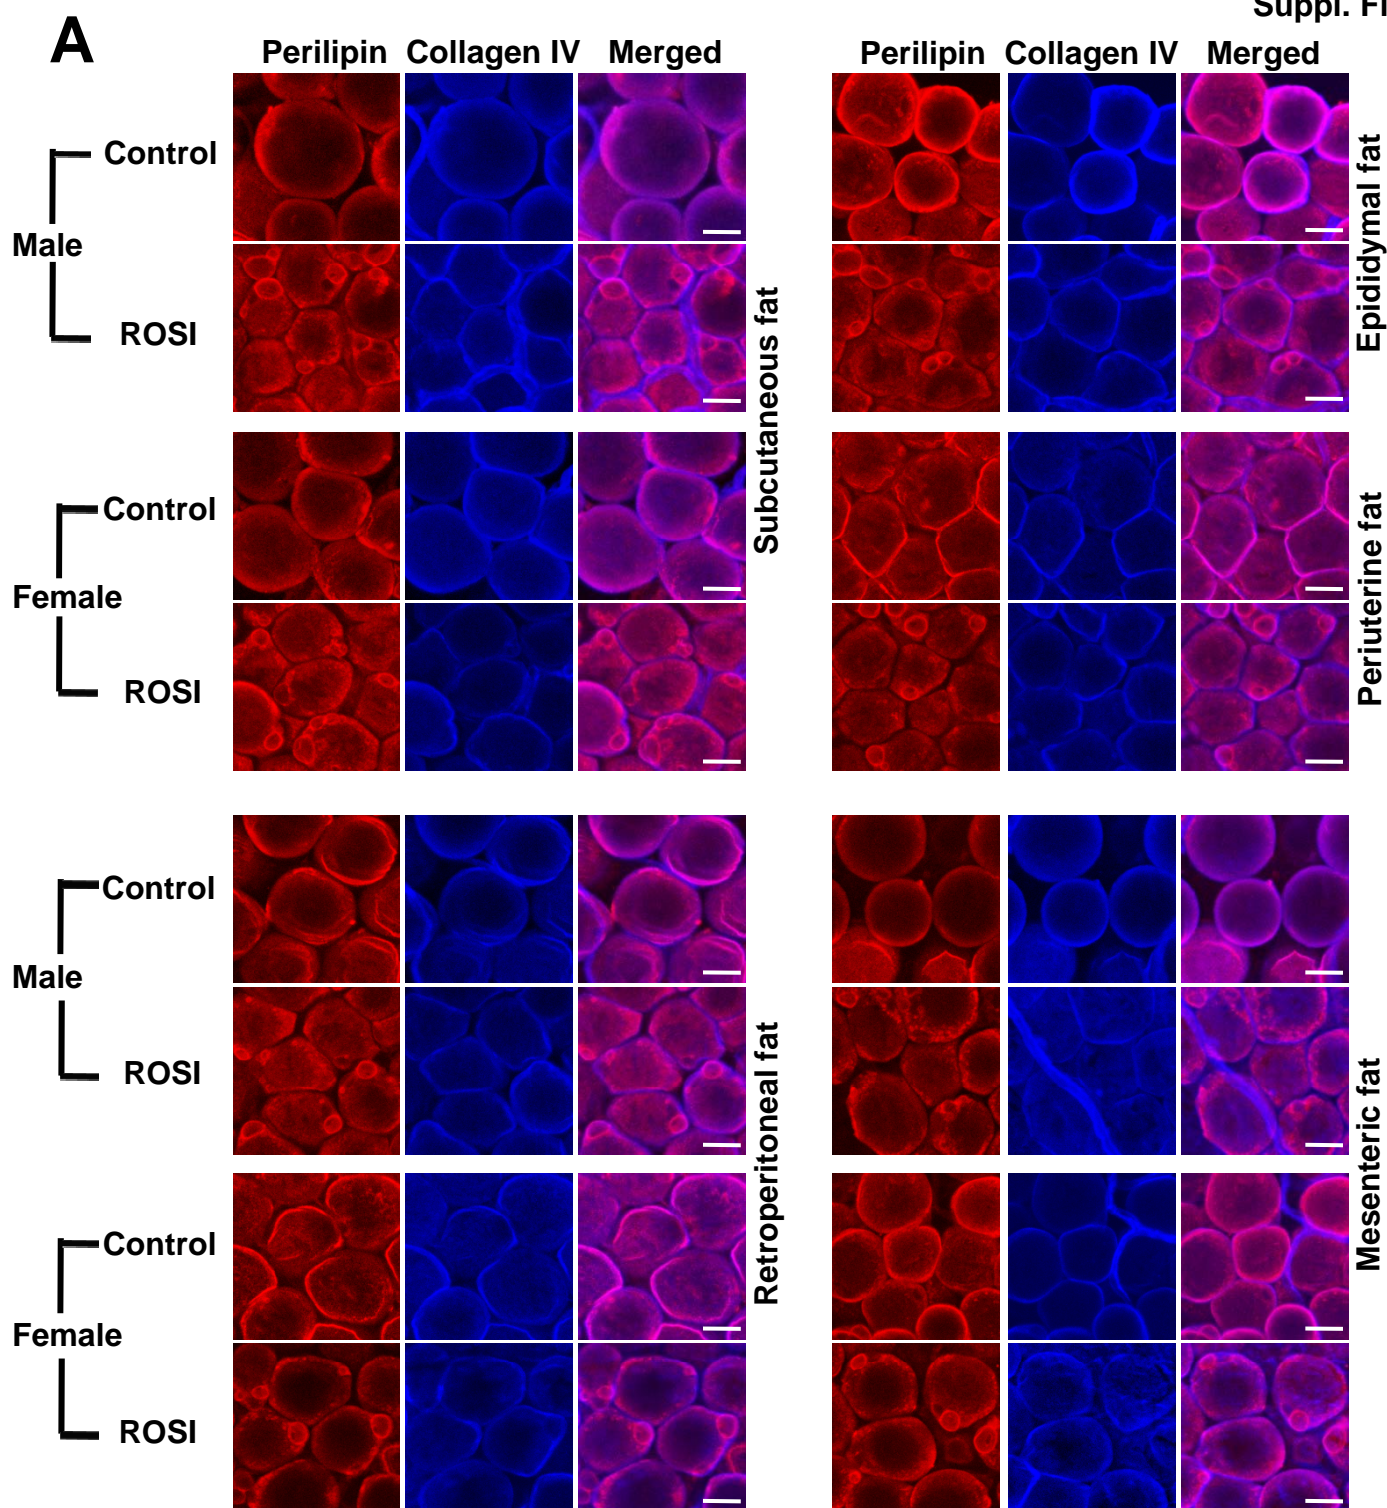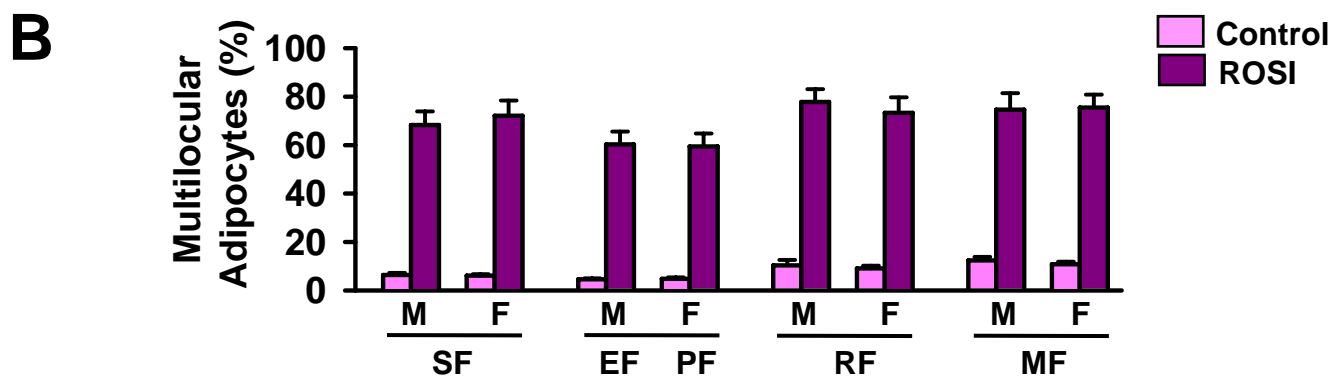

Supplementary Fig. 2

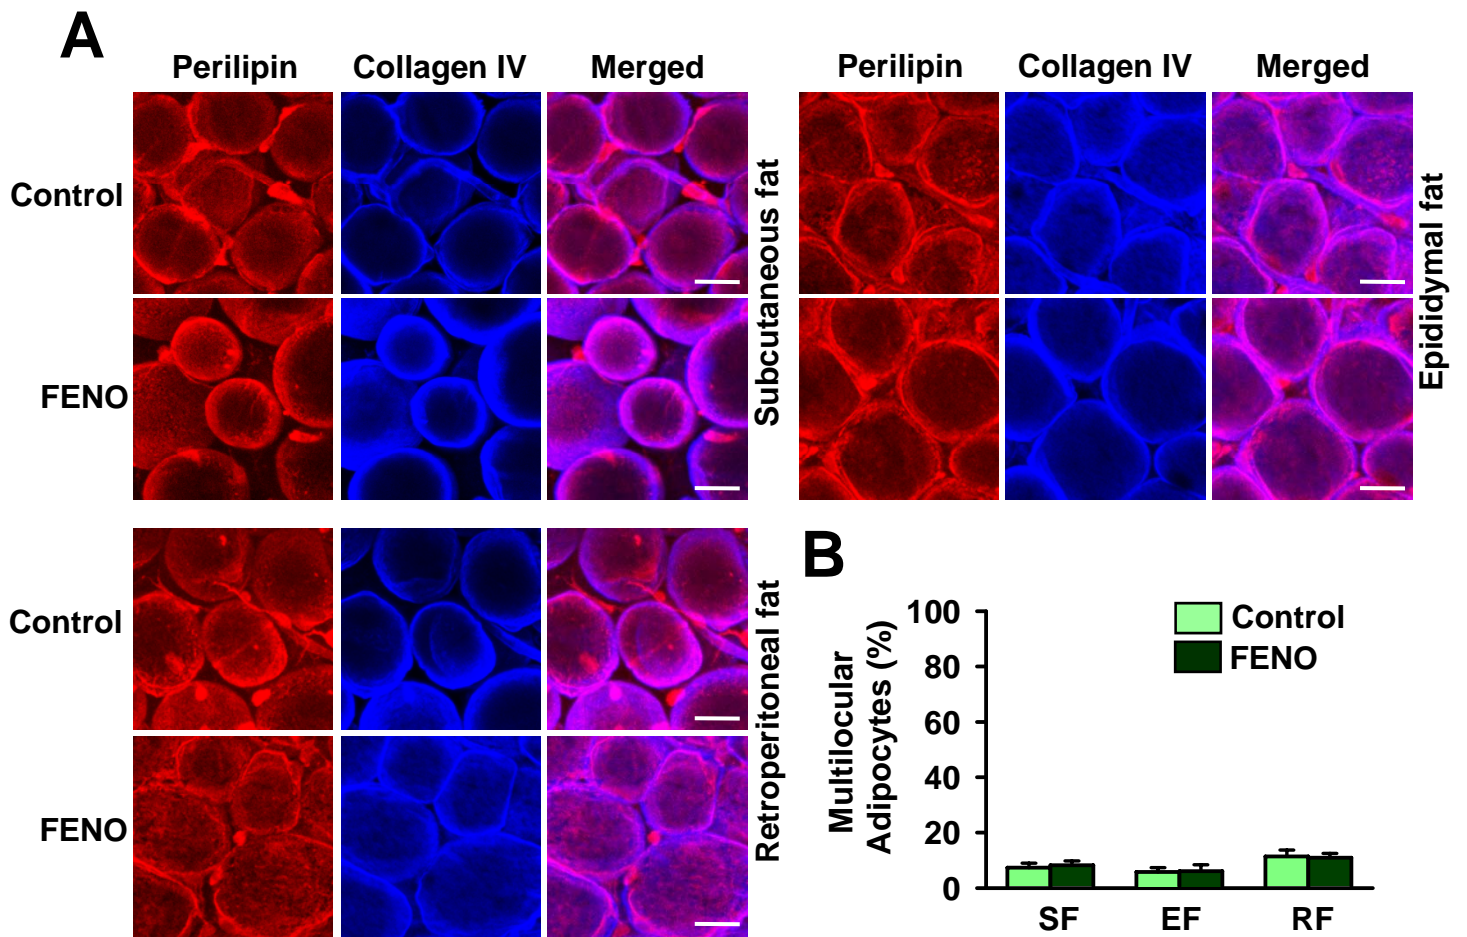

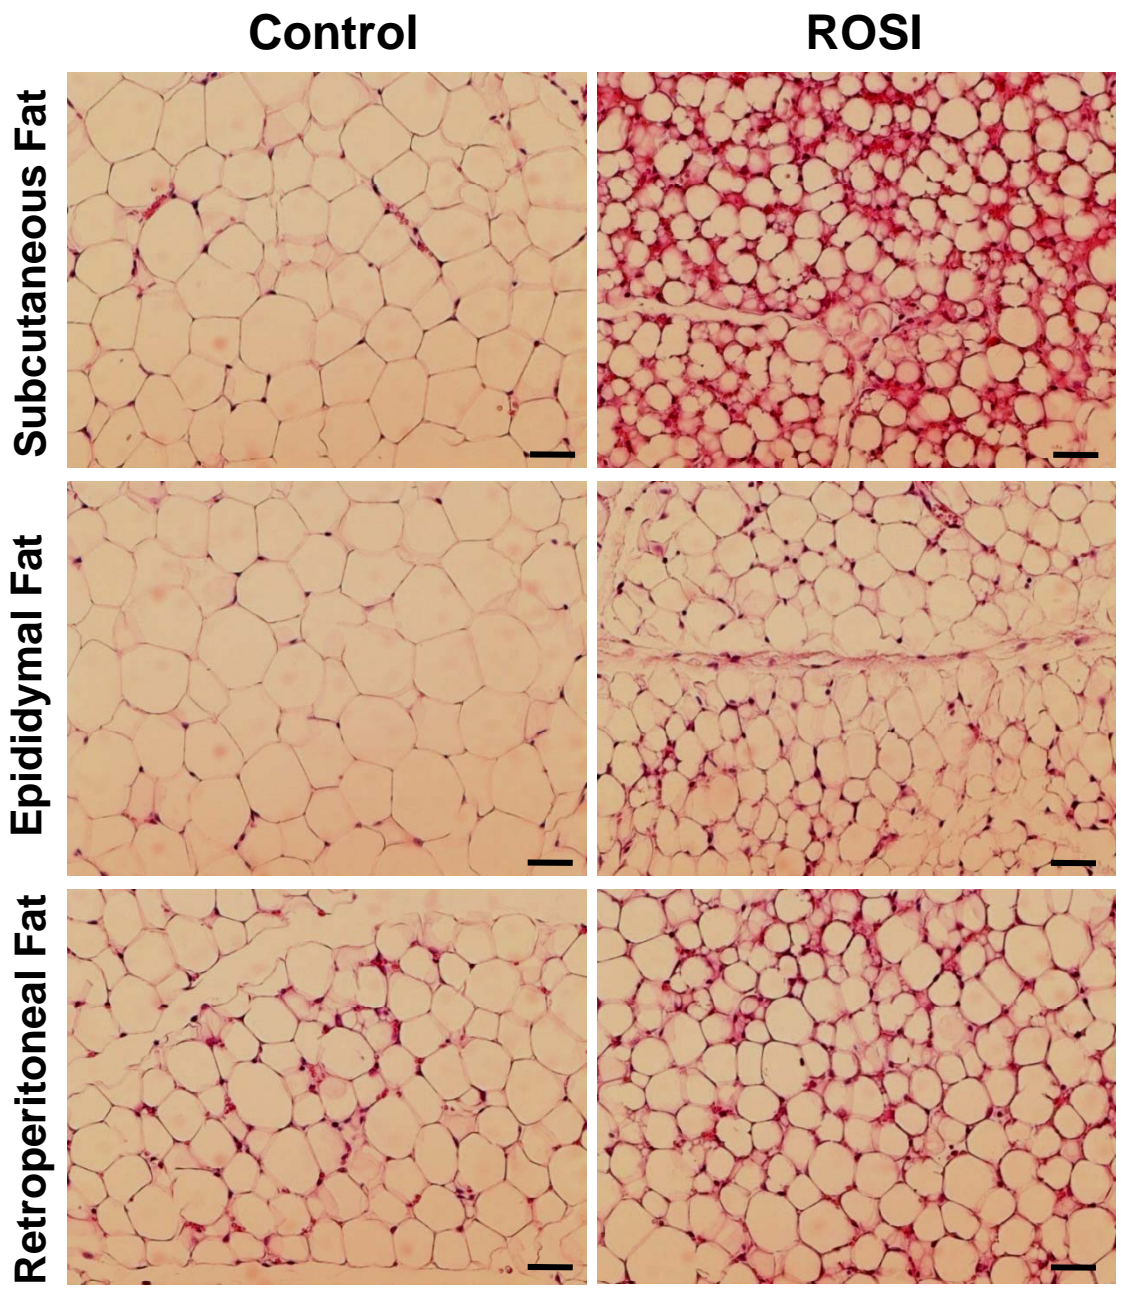

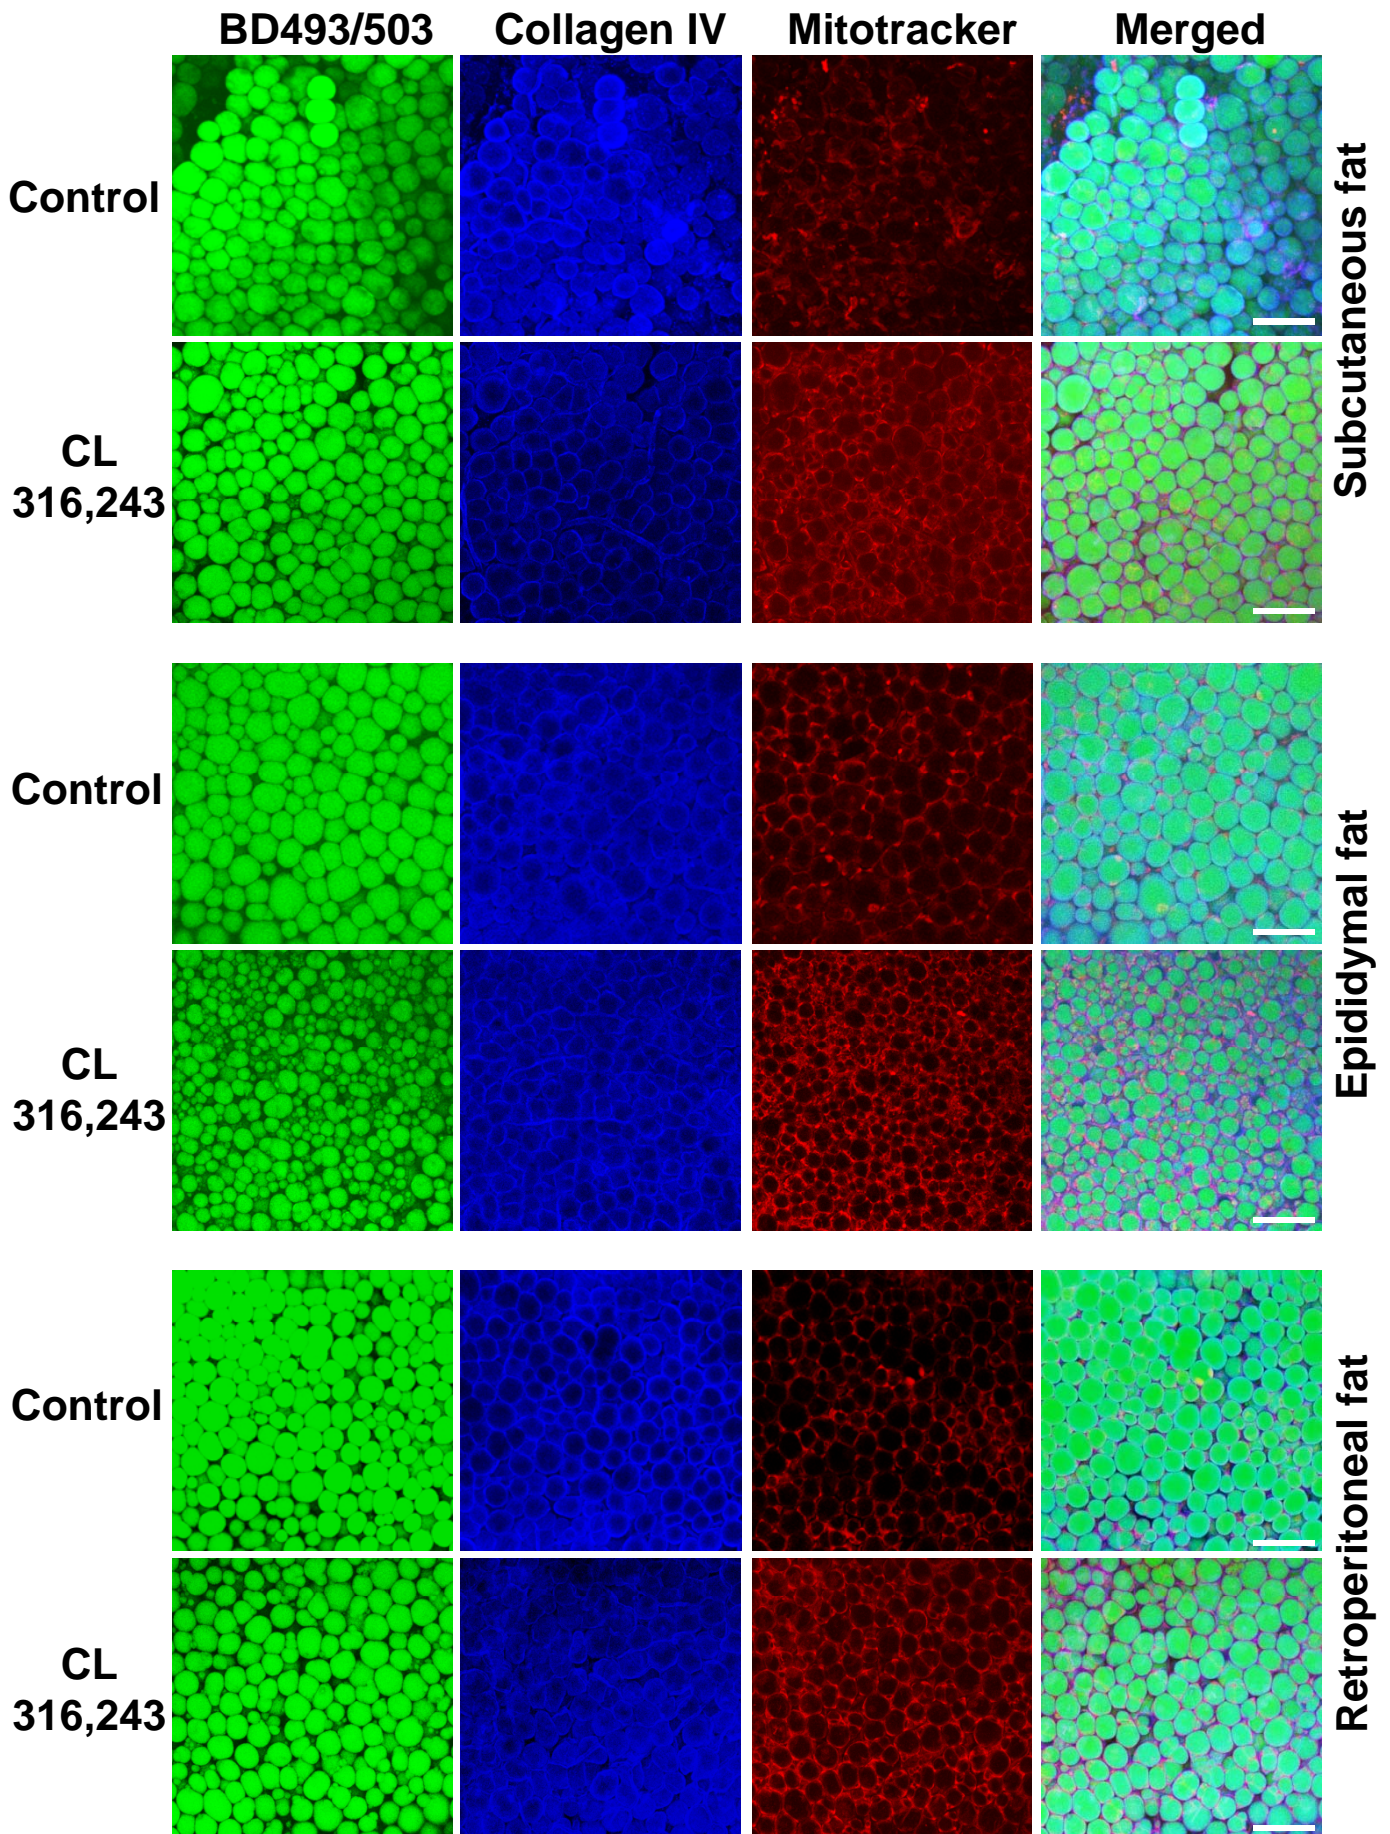



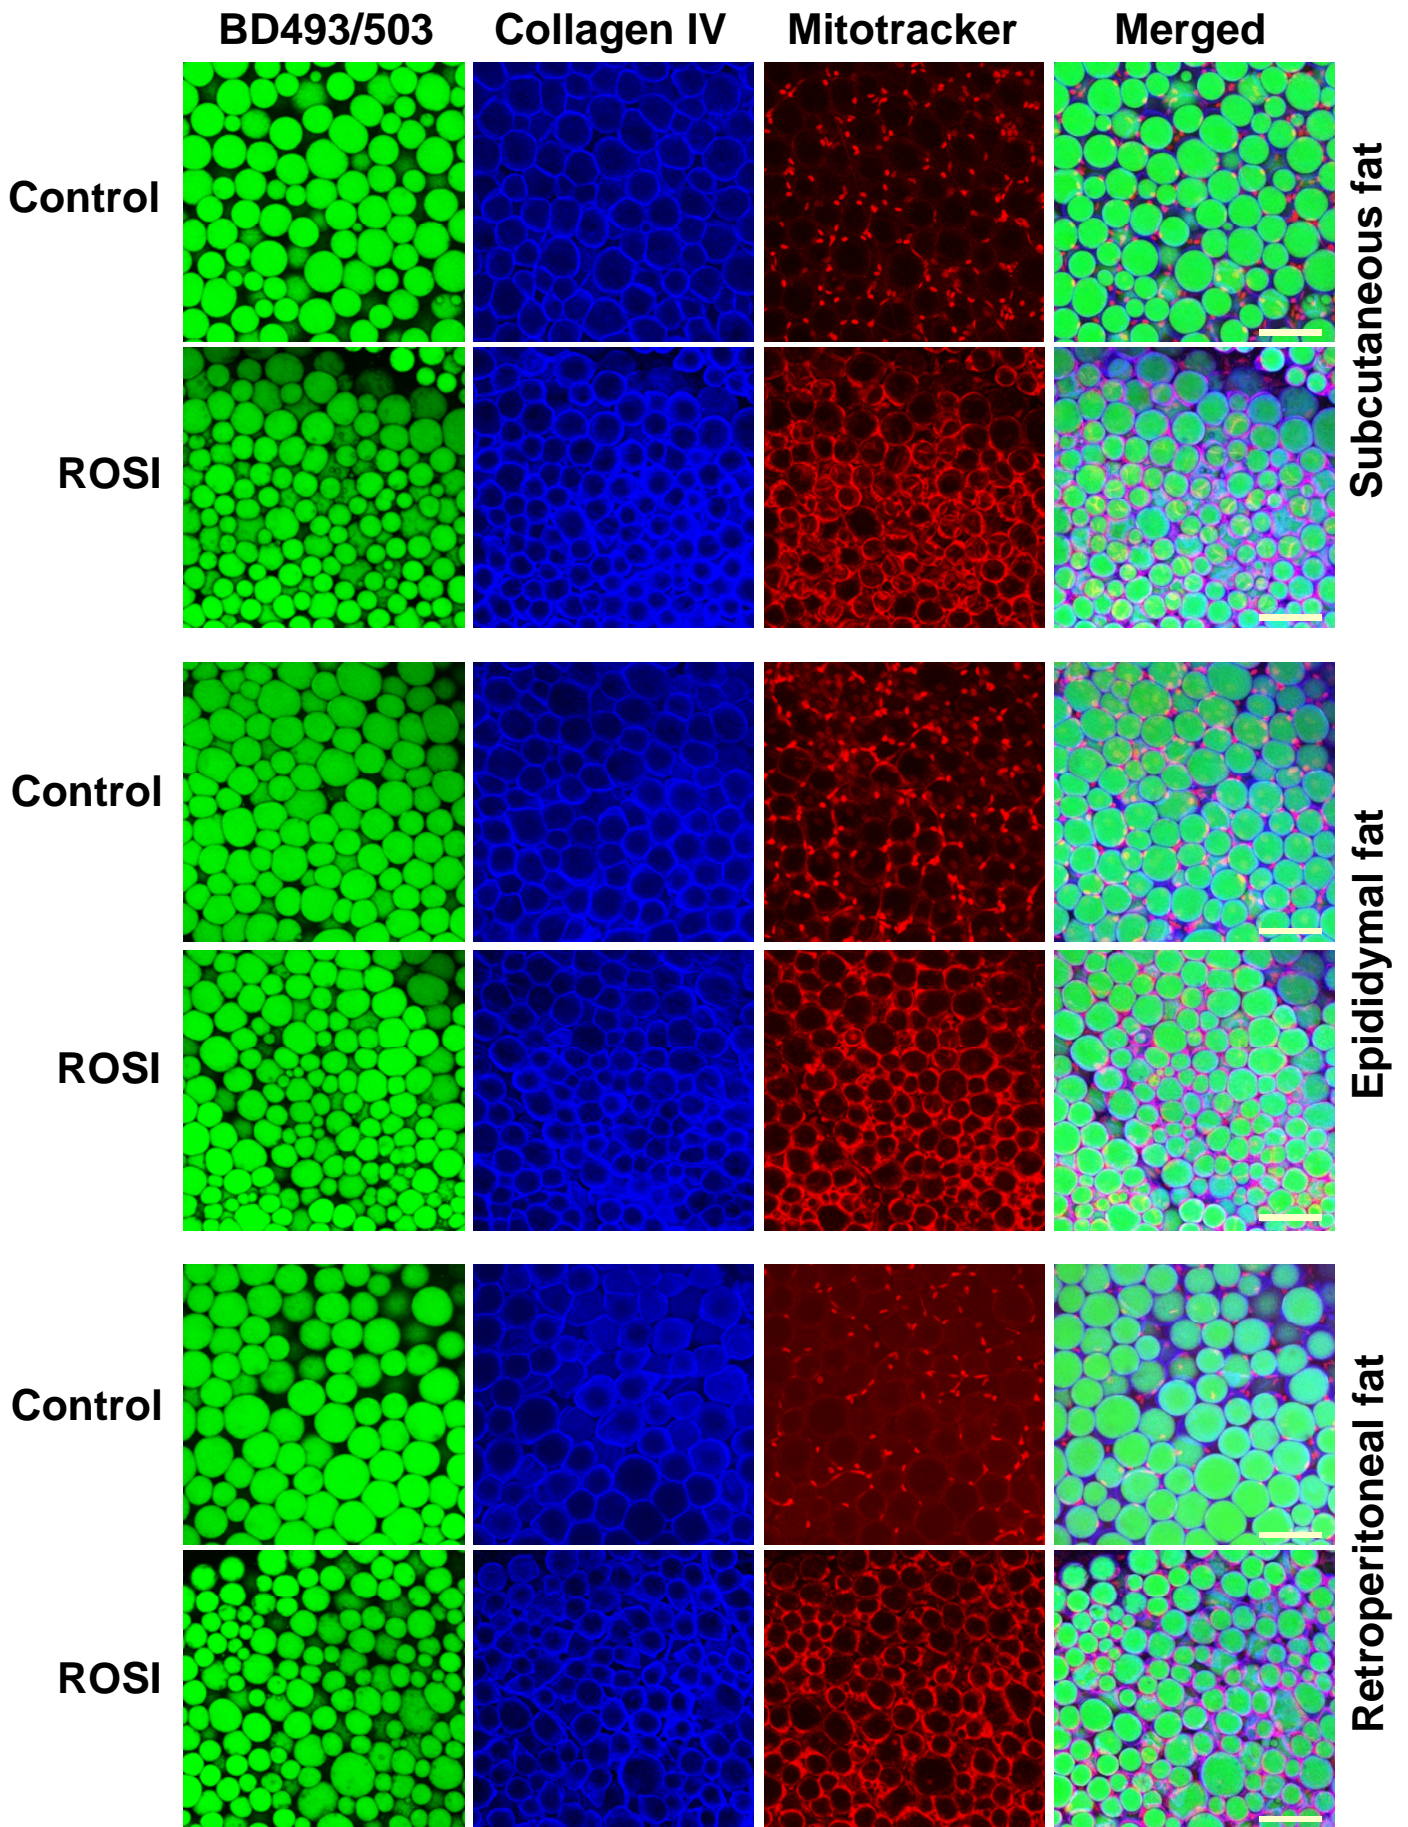

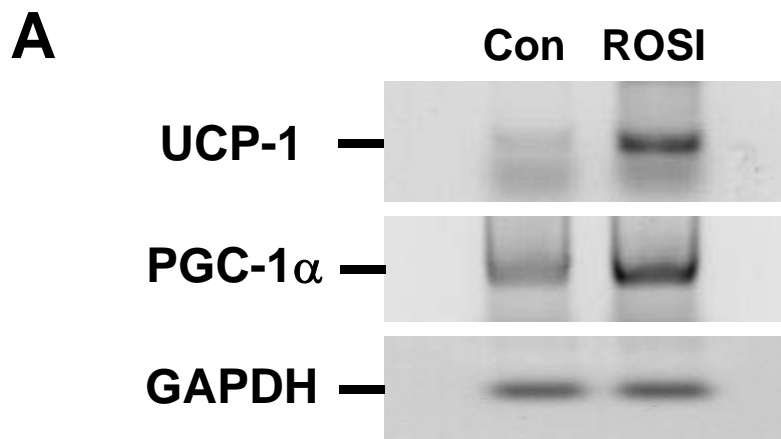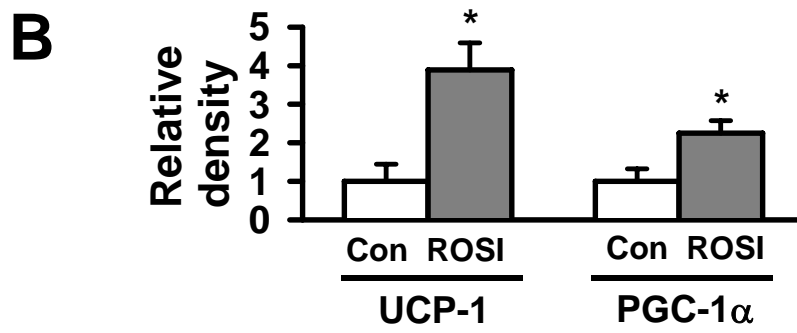

Supplement: emm-41-880-s001.pdf [file emm-41-880-s001.pdf]
